# Supplementary material
Source: Elsevier journal article supplement (http://www.york.ac.uk/media/healthsciences/documents/research/public-health/mmc1.pdf)
Supplement: mmc1 [file mmc1.pdf]

TAB]

Table S1 Summary of studies of income inequality and health over time, additional to Zheng (2012)

| Reference              | Outcome                | Country                                                                                                                        | Sample     | Observation Level | Inequality Measure         | Covariates               | Estimator                         | Result(s)<br>βineq; p-value | Other Tests                                                              | Findings       |
|------------------------|------------------------|--------------------------------------------------------------------------------------------------------------------------------|------------|-------------------|----------------------------|--------------------------|-----------------------------------|-----------------------------|--------------------------------------------------------------------------|----------------|
| Babones (2008)         | Life Expectancy        | 96 Countries<br>94 Countries (Exl. Soviet Block)<br>45 Countries (Trend Cases)<br>43 Countries (Trend cases exl. Soviet block) | 1970--1995 | Country           | Gini                       | GDP per capita           | Fixed effect (1st Difference) OLS | -0.031; p>0.1               | Simple regression, Cross Sectional Regressions, Income artefact exercise | Not Supportive |
|                        |                        |                                                                                                                                |            |                   |                            |                          | Fixed effect (1st Difference) OLS | 0.019; p>0.1                |                                                                          | Not Supportive |
|                        |                        |                                                                                                                                |            |                   |                            |                          | Fixed effect (1st Difference) OLS | -0.055; p>0.1               |                                                                          | Not Supportive |
|                        |                        |                                                                                                                                |            |                   |                            |                          | Fixed effect (1st Difference) OLS | 0.071; p>0.1                |                                                                          | Not Supportive |
|                        | Child Mortality        | 92 Countries<br>89 Countries (Exl. Soviet Block)<br>45 Countries (Trend cases)<br>42 Countries (Trend cases exl. Soviet block) | 1970--1995 | Country           | Gini                       | GDP per capita           | Fixed effect (1st Difference) OLS | 0.091; p>0.1                |                                                                          | Not Supportive |
|                        |                        |                                                                                                                                |            |                   |                            |                          | Fixed effect (1st Difference) OLS | 0.101; p>0.1                |                                                                          | Not Supportive |
|                        |                        |                                                                                                                                |            |                   |                            |                          | Fixed effect (1st Difference) OLS | 0.162; p>0.1                |                                                                          | Not Supportive |
|                        |                        |                                                                                                                                |            |                   |                            |                          | Fixed effect (1st Difference) OLS | 0.191; p>0.1                |                                                                          | Not Supportive |
| Cantarero et al (2005) | Life Expectancy (male) | International                                                                                                                  | 1993-2000  | Country           | Gini (OECD Scale)          | (1/GDP), (1/GDP) squared | REM                               | -0.073; p<0.1               | NB: Hausman Test<br>prefers FEM estimates                                | Supportive     |
|                        |                        |                                                                                                                                |            |                   |                            |                          | FEM                               | -0.094; p<0.05              |                                                                          | Supportive     |
|                        |                        |                                                                                                                                |            |                   | Gini (Modified OECD scale) |                          | REM                               | -0.075; p<0.05              |                                                                          | Supportive     |
|                        |                        |                                                                                                                                |            |                   |                            |                          | FEM                               | -0.097; p<0.05              |                                                                          | Supportive     |
|                        | Child Mortality        | International                                                                                                                  | 1993-2000  | Country           | Gini (OECD Scale)          |                          | REM                               | 0.069; p<0.05               | NB: Hausman Test<br>prefers REM estimates                                | Supportive     |
|                        |                        |                                                                                                                                |            |                   |                            |                          | FEM                               | 0.087; p<0.1                |                                                                          | Supportive     |
|                        |                        |                                                                                                                                |            |                   | Gini (Modified OECD scale) |                          | REM                               | 0.057; p<0.1                |                                                                          | Supportive     |
|                        |                        |                                                                                                                                |            |                   |                            |                          | FEM                               | 0.097; p>0.1                |                                                                          | Not Supportive |

TAB]

| Author (Year)    | Variable                             | Country       | Period    | Level    | Control Variables    | Method                                                                                                                                                                                                                                                            | Estimate        | Significance | Notes                                                                         | Conclusion                                                        |            |
|------------------|--------------------------------------|---------------|-----------|----------|----------------------|-------------------------------------------------------------------------------------------------------------------------------------------------------------------------------------------------------------------------------------------------------------------|-----------------|--------------|-------------------------------------------------------------------------------|-------------------------------------------------------------------|------------|
| Clarkwest (2008) | Change in life expectancy            | USA           | 1970-2000 | Regional | $\Delta$ Gini        | OLS                                                                                                                                                                                                                                                               | -0.100          | p<0.01       | Alternate specification with different fixed effects and other initial values | Supportive                                                        |            |
| Drabo (2011)     | CO2 Emissions                        | International | 1970-2000 | Country  | Gini (EHII database) | 1st Stage: EHII, GDP per capita, GDP per capita squared, population density, Primary School enrolment, Fertiliser use, Foreign direct investment, trade openness<br>2nd Stage: GDP per capitat-1, Immunisation rate, Primary School enrollmentt-1, CO2 emissions* | 2SLS: 1st Stage | 4.41         | p<0.05                                                                        | Alternate specifications with different environmental indicators, |            |
|                  | Log odds of under five survival rate |               |           |          |                      |                                                                                                                                                                                                                                                                   | 2SLS: 2nd Stage | -0.23        | p<0.1                                                                         |                                                                   | Supportive |
|                  | SO2 Emissions                        |               |           |          |                      |                                                                                                                                                                                                                                                                   | 2SLS: 1st Stage | 2.82         | p>0.1                                                                         |                                                                   |            |
|                  | Log odds of under five survival rate |               |           |          |                      |                                                                                                                                                                                                                                                                   | 2SLS: 2nd Stage | -0.21        | p<0.01                                                                        |                                                                   | Mixed      |
|                  | Biological Oxygen Demand             |               |           |          |                      |                                                                                                                                                                                                                                                                   | 2SLS: 1st Stage | 9.58         | p<0.1                                                                         |                                                                   |            |
|                  | Log odds of under five survival rate |               |           |          |                      |                                                                                                                                                                                                                                                                   | 2SLS: 2nd Stage | -0.24        | p<0.01                                                                        |                                                                   | Supportive |
|                  | Log odds of under five survival rate |               |           |          |                      |                                                                                                                                                                                                                                                                   | GMM             | -1.40        | p<0.05                                                                        |                                                                   | Supportive |

TAB]

|                            |                                      |               |                |            |               |                                                                                                                                                                                                                                                                                                           |                |               |                                                                                                                                                                                                                 |
|----------------------------|--------------------------------------|---------------|----------------|------------|---------------|-----------------------------------------------------------------------------------------------------------------------------------------------------------------------------------------------------------------------------------------------------------------------------------------------------------|----------------|---------------|-----------------------------------------------------------------------------------------------------------------------------------------------------------------------------------------------------------------|
|                            | Log odds of under five survival rate |               |                |            |               | GDP per capita, immunisation rate, Primary school enrolment, fertiliser use, two lags of the dependent variable, CO2 Emissions                                                                                                                                                                            | GMM            | -1.20; p<0.1  | Supportive                                                                                                                                                                                                      |
|                            | Log odds of under five survival rate |               |                |            |               | GDP per capita, immunisation rate, Primary school enrolment, fertiliser use, two lags of the dependent variable, SO2 Emissions                                                                                                                                                                            | GMM            | -1.30; p<0.05 | Supportive                                                                                                                                                                                                      |
|                            | Log odds of under five survival rate |               |                |            |               | GDP per capita, immunisation rate, Primary school enrolment, fertiliser use, two lags of the dependent variable, Biological Oxygen demand                                                                                                                                                                 | GMM            | 1.10; p>0.1   | Not Supportive                                                                                                                                                                                                  |
| Gravelle and Sutton (2009) | Self Assessed Health                 | Great Britain | 1980-2000/2001 | Individual | Regional Gini | controls<br>rents home, medium formal qualification, low formal qualification, foreign/other formal qualification, no formal qualification, social class II-V, Social Class unclassified, Equivalised income, equivalised income squared, equivalised income cubed, equivalised income 4th root, regional | Ordered Probit | -1.60; p<0.01 | Tests of relative deprivation with alternate measures, alternate specifications of regional gini coefficient including lags, alternate specifications of national gini coefficient including lags<br>Supportive |
|                            |                                      |               |                |            |               | controls, time fixed effects                                                                                                                                                                                                                                                                              | Ordered Probit | 0.94; p<0.01  | Mixed                                                                                                                                                                                                           |

TAB]

|               |                                                                                                                                                                                                                                                                                                         |                |               |            |
|---------------|---------------------------------------------------------------------------------------------------------------------------------------------------------------------------------------------------------------------------------------------------------------------------------------------------------|----------------|---------------|------------|
|               | rents home, medium formal qualification, low formal qualification, foreign/other formal qualification, no formal qualification, social class II-V, Social Class unclassified, Equivalised income, equivalised income squared, equivalised income cubed, equivalised income 4th root                     | Ordered Probit | -1.63; p<0.01 | Supportive |
|               | rents home, medium formal qualification, low formal qualification, foreign/other formal qualification, no formal qualification, social class II-V, Social Class unclassified, Equivalised income, equivalised income squared, equivalised income cubed, equivalised income 4th root, time fixed effects | Ordered Probit | -0.77; p<0.01 | Supportive |
| National Gini | controls                                                                                                                                                                                                                                                                                                | Ordered Probit | -1.76; p<0.01 | Supportive |

TAB]

|                           |                           |    |           |            |      |                                                                                                                                                                                                                                                                                                                          |                                |                                              |                                                                                                                                                                          |
|---------------------------|---------------------------|----|-----------|------------|------|--------------------------------------------------------------------------------------------------------------------------------------------------------------------------------------------------------------------------------------------------------------------------------------------------------------------------|--------------------------------|----------------------------------------------|--------------------------------------------------------------------------------------------------------------------------------------------------------------------------|
|                           |                           |    |           |            |      | rents home, medium formal qualification, low formal qualification, foreign/other formal qualification, no formal qualification, social class II-V, Social Class unclassified, Equivalised income, equivalised income squared, equivalised income cubed, equivalised income 4th root, regional controls, time fixed trend | Ordered Probit                 | 1.33; p<0.01                                 | Mixed                                                                                                                                                                    |
|                           |                           |    |           |            |      | rents home, medium formal qualification, low formal qualification, foreign/other formal qualification, no formal qualification, social class II-V, Social Class unclassified, Equivalised income, equivalised income squared, equivalised income cubed, equivalised income 4th root                                      | Ordered Probit                 | -1.73; p<0.01                                | Supportive                                                                                                                                                               |
|                           |                           |    |           |            |      | rents home, medium formal qualification, low formal qualification, foreign/other formal qualification, no formal qualification, social class II-V, Social Class unclassified, Equivalised income, equivalised income squared, equivalised income cubed, equivalised income 4th root, time trend                          | Ordered Probit                 | 1.30; p<0.05                                 | Mixed                                                                                                                                                                    |
| Lorgelly & Lindley (2008) | Self-rated health (males) | UK | 1991–2004 | Individual | Gini | ln(income), ln(regional mean income), age, age squared, ethnicity, marriage, higher education, A-levels or similar, O-levels or similar                                                                                                                                                                                  | Ordered Probit<br>REOP<br>FEOP | 0.309; p>0.1<br>0.200; p>0.1<br>0.229; p>0.1 | Alternate specification with other income inequality measures, sensitivity analysis to ln(income), Attrition tests<br>Not Supportive<br>Not Supportive<br>Not Supportive |

TAB]

| Author (Year)                  | Outcome                            | Geography                                    | Time Period | Level    | Variable | Model                                                                                                                                                                                   | Coefficient   | Significance   | Notes                                                                                 | Supportive     |
|--------------------------------|------------------------------------|----------------------------------------------|-------------|----------|----------|-----------------------------------------------------------------------------------------------------------------------------------------------------------------------------------------|---------------|----------------|---------------------------------------------------------------------------------------|----------------|
|                                | Self-rated health (females)        |                                              |             |          |          | Ordered Probit                                                                                                                                                                          | 0.246; p>0.1  |                | Alternate specifications with different weighting scales on the gini coefficient      | Not Supportive |
| Pascual et al. (2005)          | Life expectancy (male)             | International                                | 1993-2000   | Regional | Gini     | (1/GDPpc), (1/GDPpc) squared                                                                                                                                                            | REM           | -0.079; p<0.05 |                                                                                       | Supportive     |
|                                | FEM                                |                                              |             |          |          |                                                                                                                                                                                         | 0.086; p<0.1  |                | Supportive                                                                            |                |
| Ram (2005)                     | Deaths per 100,000                 | USA (51 States)<br>USA(48 Contiguous States) | 1990-2000   | State    | Gini     | Personal income per capita, percentage of population with high school, percentage of population with university, proportion of population that is black, percentage of urban population | OLS           | 856.04; p<0.05 | Alternate Specifications with poverty included, correlations, stepwise specifications | Supportive     |
|                                |                                    |                                              |             |          |          |                                                                                                                                                                                         | OLS           | 513.82; p<0.05 |                                                                                       | Supportive     |
|                                |                                    |                                              |             |          |          |                                                                                                                                                                                         | OLS           | 0.484; p<0.01  |                                                                                       | Supportive     |
| Torre & Myrskylä (2011)        | Life expectancy at birth (males)   | International                                | 1975-2006   | Country  | Gini     | GDP per capita                                                                                                                                                                          | FEM           | -0.011; p>0.1  | Correlations                                                                          | Not Supportive |
|                                | Mortality Age 0 (males)            |                                              |             |          |          |                                                                                                                                                                                         | 0.470; p<0.01 | Supportive     |                                                                                       |                |
|                                | Mortality Ages 1-14 (males)        |                                              |             |          |          |                                                                                                                                                                                         | 0.373; p<0.01 | Supportive     |                                                                                       |                |
|                                | Mortality Ages 15-49 (males)       |                                              |             |          |          |                                                                                                                                                                                         | 0.285; p<0.01 | Supportive     |                                                                                       |                |
|                                | Mortality Ages 50-64 (males)       |                                              |             |          |          |                                                                                                                                                                                         | -0.031; p>0.1 | Not Supportive |                                                                                       |                |
|                                | Mortality Ages 65-90 (males)       |                                              |             |          |          |                                                                                                                                                                                         | -0.025; p>0.1 | Not Supportive |                                                                                       |                |
|                                | Life expectancy at birth (females) |                                              |             |          |          |                                                                                                                                                                                         | -0.014; p>0.1 | Not Supportive |                                                                                       |                |
|                                | Mortality Age 0 (females)          |                                              |             |          |          |                                                                                                                                                                                         | 0.465; p<0.01 | Supportive     |                                                                                       |                |
|                                | Mortality Ages 1-14 (females)      |                                              |             |          |          |                                                                                                                                                                                         | 0.424; p<0.01 | Supportive     |                                                                                       |                |
|                                | Mortality Ages 15-49 (females)     |                                              |             |          |          |                                                                                                                                                                                         | 0.171; p<0.1  | Supportive     |                                                                                       |                |
|                                | Mortality Ages 50-64 (females)     |                                              |             |          |          |                                                                                                                                                                                         | 0.038; p>0.1  | Not Supportive |                                                                                       |                |
| Mortality Ages 65-90 (females) | 0.055; p>0.1                       | Not Supportive                               |             |          |          |                                                                                                                                                                                         |               |                |                                                                                       |                |

\*Note that for the second stage of the 2SLS model we report the coefficient for CO2 emissions, as it mediates the effects of income inequality due to the IV procedure
